# Supplementary material
Source: publisher figshare collection journal article supplement (https://asha.figshare.com/articles/dataset/_/14403026)
Supplement: Supplementary file 1 [file 1]

**Supplemental Material S1.** Word Structure subtest alternate responses for Jamaican Creole–English speaking adults and children.

| <b>Subtest Target<br/>Grammatical Structure<br/>(Item #)</b> | <b>Alternate Responses<br/>Theme: JC-influenced<br/>morphological structure</b>      | <b>Percentage<br/>Use<br/>Children<br/>(Adults)</b> | <b>Alternate Responses<br/>Theme: JC-influenced<br/>lexical variation</b> | <b>Percentage<br/>Use<br/>Children<br/>(Adults)</b> |
|--------------------------------------------------------------|--------------------------------------------------------------------------------------|-----------------------------------------------------|---------------------------------------------------------------------------|-----------------------------------------------------|
| Comparative<br>(#18)                                         | fas[t]; fastest; even fasa                                                           | 21%<br>(6.1%)                                       | <i>None noted</i>                                                         | 0%<br>(0%)                                          |
| Copula be<br>(#7)                                            | it big; it bigger; big one                                                           | 14.2%<br>(12.1%)                                    | <i>None noted</i>                                                         | 0%<br>(0%)                                          |
| Future tense<br>(#15)                                        | slide; is waiting to slide                                                           | 35.8%<br>(9.1%)                                     | climb; is climbing                                                        | 5.7%<br>(9.1%)                                      |
| Irregular past tense<br>(#23, #24)                           | fall[s]; [have] fallen;<br>falled; [are] falling;<br>blowed; blow[s]; was<br>blowing | 49.7%<br>(36.4%)                                    | drop; dropped; [are]<br>dropping; burst                                   | 24.4%<br>(3%)                                       |
| Noun derivation<br>(#13)                                     | singa [man]                                                                          | 8%<br>(3%)                                          | musician; entertainer/a                                                   | 0%<br>(15.2%)                                       |
| Objective pronoun<br>(#6)                                    | she                                                                                  | 18.2%<br>(3%)                                       | <i>None noted</i>                                                         | 0%<br>(0%)                                          |
| Possessive noun<br>(#12)                                     | king/queen crown;<br>king/queen                                                      | 68.8%<br>(39.4%)                                    | <i>None noted</i>                                                         | 0%<br>(0%)                                          |
| Possessive pronoun<br>(#4)                                   | [h]er; [h]er own; [h]er<br>dog                                                       | 11.4%<br>(6.1%)                                     | <i>None noted</i>                                                         | 0%<br>(0%)                                          |
| Preposition “on”<br>(#5)                                     | <i>None noted</i>                                                                    | 0%<br>(0%)                                          | pon the chair; in the chair                                               | 6.8%<br>(21.2%)                                     |
| Present progressive<br>(#1, #2)                              | sleep; a sleep; walk; a<br>walk                                                      | 2.3%<br>(6.1%)                                      | <i>None noted</i>                                                         | 0%<br>(0%)                                          |
| Regular past tense<br>(#17)                                  | [will] climb; climbs;<br>climbing                                                    | 52.3%<br>(48.5%)                                    | <i>None noted</i>                                                         | 0%<br>(0%)                                          |
| Regular plural<br>(#10)                                      | [h]orse; two [h]orse                                                                 | 73.3%<br>(21.2%)                                    | <i>None noted</i>                                                         | 0%<br>(0%)                                          |
| Reflexive pronoun<br>(#16)                                   | [h]er; [h]er socks; [h]er<br>foot                                                    | 10.8%<br>(15.2%)                                    | <i>None noted</i>                                                         | 0%<br>(0%)                                          |
| Subjective pronoun<br>(#14, #20)                             | [h]im standing                                                                       | 15.1%<br>(7.6%)                                     | the boy is; boy standing                                                  | 31.5%<br>(7.6%)                                     |

|                                    |                                                 |                  |                          |                  |
|------------------------------------|-------------------------------------------------|------------------|--------------------------|------------------|
| Superlative<br>(#19)               | fas[t]; [more] faster;<br>faster than both      | 23.9%<br>(12.1%) | <i>None noted</i>        | 0%<br>(0%)       |
| Third person singular<br>(#9, #11) | sleep; [is] sleeping; fly;<br>[is] flying; flew | 53.4%<br>(40.9%) | <i>None noted</i>        | 0%<br>(0%)       |
| Uncontractible be<br>(#21, #22)    | she/he is; [h]im/she<br>[and him]; them/dem     | 29.8%<br>(15.2%) | the boy/girl; those boys | 17.1%<br>(13.6%) |

---

*Note.* The [ ] indicates a response with or without the form (e.g., [is] sleeping = “is sleeping” or “sleeping” were used by participants). Percentage use calculated by dividing the total number of coded responses for the target structure by the total number of responses to the target item across participants. 22 out of 24 (91.7%) test items received adapted scoring. In line with CELF Preschool-2 manual guidelines, phonological variation may also be present (e.g., “horse” produced as /ɔs/) and should not be penalized. The productions in this table do not represent an exhaustive list of potential responses, but rather are representative of productions used by participants in this study. For example, “horse dem” would also be an appropriate JC-influenced production for the English target “horses.”
