# Supplementary material
Source: publisher figshare collection journal article supplement (https://asha.figshare.com/articles/dataset/_/14403026)
Supplement: Supplementary file 2 [file 1]

**Supplemental Material S2.** Expressive Vocabulary Structure subtest alternate responses for Jamaican Creole–English speaking adults and children.

| <b>Subtest Target Response</b><br>(Item #) | <b>Alternate Responses</b><br>Theme: JC-influenced lexical variation                    | <b>Percentage Use</b><br>Children<br>(Adults) | <b>Alternate Responses</b><br>Theme: Use of functional description                                           | <b>Percentage Use</b><br>Children<br>(Adults) |
|--------------------------------------------|-----------------------------------------------------------------------------------------|-----------------------------------------------|--------------------------------------------------------------------------------------------------------------|-----------------------------------------------|
| Audience (#19)                             | crowd; congregation; choir; musicians; people dem; a plenty people                      | 24.4%<br>(6.1%)                               | people who listen to music; listening people; dem a listen                                                   | 4%<br>(6.1%)                                  |
| Binoculars (#16)                           | microscope; goggles; telescope; night vision; camera; binocles                          | 34.1%<br>(54.5%)                              | used to see from a distance; to see things from afar; to see far or near; something to spy; you look through | 21%<br>(6.1%)                                 |
| Branch (#11)                               | stem; [tree] trunk                                                                      | 14.8%<br>(18.2%)                              | <i>None noted</i>                                                                                            | 0%<br>(0%)                                    |
| Calculator (#13)                           | <i>None noted</i>                                                                       | 0%<br>(0%)                                    | to add up numbers                                                                                            | 1.1%<br>(3%)                                  |
| Calendar (#15)                             | month of the year; almanac; dates                                                       | 11.9%<br>(9.1%)                               | <i>None noted</i>                                                                                            | 0%<br>(0%)                                    |
| Footprint (#9)                             | Foot; feet; foot bottom; print of foot; footprint; bottom of the foot; footmark         | 36.4%<br>(15.2%)                              | <i>None noted</i>                                                                                            | 0%<br>(0%)                                    |
| Newspaper (#7)                             | gleaner; [news]book; magazine; star                                                     | 6.3%<br>(18.2%)                               | <i>None noted</i>                                                                                            | 0%<br>(0%)                                    |
| Piano (#5)                                 | organ                                                                                   | 0%<br>(3%)                                    | <i>None noted</i>                                                                                            | 0%<br>(0%)                                    |
| Pouring (#6)                               | throw[ing]; chrow[ing]; turn[ing] out                                                   | 48.3%<br>(27.3%)                              | <i>None noted</i>                                                                                            | 0%<br>(0%)                                    |
| Scale (#20)                                | weight something; weight measure                                                        | 5.1%<br>(6.1%)                                | test your weight; a count how much you weigh; to put your foot to see how much weight                        | 18.2%<br>(6.1%)                               |
| Stamp (#17)                                | logo; sticker/stika; post                                                               | 6.3%<br>(6.1%)                                | <i>None noted</i>                                                                                            | 0%<br>(0%)                                    |
| Telescope (#12)                            | [spy/eye/spotting] scope/glass; microscope; stethoscope; tethiscope; binoculars; camera | 27.8%<br>(54.5%)                              | used to spy; look through to see far or near; to see the moon and stars                                      | 9.1%<br>(6.1%)                                |

|                       |                                                                        |                 |                                                 |                |
|-----------------------|------------------------------------------------------------------------|-----------------|-------------------------------------------------|----------------|
| Trophy<br>(#10)       | medal; cup                                                             | 5.7%<br>(6.1%)  | <i>None noted</i>                               | 0%<br>(0%)     |
| Veterinarian<br>(#18) | surgeon; animal doctor/dakta;<br>vet doctor/dakta; dog<br>doctor/dakta | 7.2%<br>(12.1%) | a doctor that cares for pets                    | 0.6%<br>(6.1%) |
| Wheelchair<br>(#14)   | a chair wheel                                                          | 2.3%<br>(3%)    | a chair with wheels to push; a<br>pushing chair | 2.3%<br>(3%)   |
| Wrapping<br>(#8)      | taping; making; fixing                                                 | 15.3%<br>(3%)   | <i>None noted</i>                               | 0%<br>(0%)     |

---

*Note.* The [ ] indicates a response with or without the form (e.g., throw[ing] = “throw” or “throwing” were used by participants). Percentage use calculated by dividing the total number of coded responses for the target structure by the total number of responses to the target item across participants. 16 out of 20 (80%) test items received adapted scoring. In line with CELF Preschool-2 manual guidelines, phonological variation may also be present (e.g., “calendar” produced as /kjalinda/) and should not be penalized. The productions in this table do not represent an exhaustive list of potential responses, but rather are representative of productions used by participants in this study. For example, “Cover [up] the box” would also be an appropriate JC-influenced production for the English target “wrapping.”
